# Supplementary material for: Assessing the magnitude of reporting bias in trials of homeopathy: a cross-sectional study and meta-analysis
Source: HighWire-hosted journal article supplement (doi:10.1136/bmjebm-2021-111846), 2022-03-15
Supplement: bmjebm-2021-111846supp001_data_supplement.pdf [file bmjebm-2021-111846supp001_data_supplement.pdf]

Supplement Table 1: Search strategies (created by authors)

| Database and host                                                                                                                                                                    | Date searched | Hits        |
|--------------------------------------------------------------------------------------------------------------------------------------------------------------------------------------|---------------|-------------|
| PubMed                                                                                                                                                                               | 13.Jul.21     | 312         |
| Embase.com (Elsevier)                                                                                                                                                                | 13.Jul.21     | 417         |
| Cochrane Central Register of Controlled Trials (CENTRAL) (Cochrane Library/Wiley) Issue 7 of 12, July 2021                                                                           | 13.Jul.21     | 218         |
| Ovid AMED (Allied and Complementary Medicine) 1985 to July 2021                                                                                                                      | 13.Jul.21     | 70          |
| CORE-Hom ( <a href="https://www.carstens-stiftung.de/datenbanken-zur-integrativen-medizin.html#/">https://www.carstens-stiftung.de/datenbanken-zur-integrativen-medizin.html#/</a> ) | 13.Jul.21     | 33          |
| Scopus.com (Elsevier)                                                                                                                                                                | 13.Jul.21     | 413         |
| <b>Total (before deduplication)</b>                                                                                                                                                  |               | <b>1463</b> |
| <b>Total (after deduplication)</b>                                                                                                                                                   |               | <b>593</b>  |

## PubMed

| Search number | Query                                                                                                                                     | Results    |
|---------------|-------------------------------------------------------------------------------------------------------------------------------------------|------------|
| 1             | "Homeopathy"[Mesh] OR "Pharmacopoeias, Homeopathic as Topic"[Mesh] OR "Formularies, Homeopathic as Topic"[Mesh] OR "Materia Medica"[Mesh] | 6,669      |
| 2             | homeopath*[Text Word] OR homoeopath*[Text Word] OR homoopath*[Text Word]                                                                  | 6,943      |
| 3             | #1 OR #2                                                                                                                                  | 8,485      |
| 4             | "Animals"[Mesh] NOT "Humans"[Mesh]                                                                                                        | 4,860,592  |
| 5             | #3 NOT #4                                                                                                                                 | 7,422      |
| 6             | randomized controlled trial[Publication Type] OR random*[Title/Abstract] OR placebo[Title/Abstract]                                       | 1,425,155  |
| 7             | #5 AND #6                                                                                                                                 | 970        |
| 8             | ("2013"[Date - Publication] : "3000"[Date - Publication])                                                                                 | 10,215,536 |
| 9             | #7 AND #8                                                                                                                                 | 312        |

## Embase.com

| No. | Query                                                                                                                                        | Results |
|-----|----------------------------------------------------------------------------------------------------------------------------------------------|---------|
| #1  | 'homeopathy'/exp OR 'homeopathic agent'/exp                                                                                                  | 11613   |
| #2  | hom*opath*:jt                                                                                                                                | 2912    |
| #3  | hom*opath*:ab,ti,kw                                                                                                                          | 8762    |
| #4  | #1 OR #2 OR #3                                                                                                                               | 14136   |
| #5  | 'animal'/exp NOT 'human'/exp                                                                                                                 | 5635114 |
| #6  | #4 NOT #5                                                                                                                                    | 13410   |
| #7  | 'randomized controlled trial'/exp OR random*:ti,ab OR placebo*:ti,ab OR 'single blind*:ti,ab OR 'double blind*:ti,ab OR 'triple blind*:ti,ab | 1909905 |
| #8  | #6 AND #7                                                                                                                                    | 1627    |
| #9  | #8 AND [2013-2021]/py                                                                                                                        | 557     |
| #10 | #9 NOT 'conference abstract'/it                                                                                                              | 417     |

## Cochrane Central Register of Controlled Trials (Cochrane Library)

| ID | Search                                                                | Hits |
|----|-----------------------------------------------------------------------|------|
| #1 | [mh Homeopathy] OR [mh "Pharmacopoeias, Homeopathic as Topic"] OR [mh | 304  |

|    |                                                                                                                                                                                                                                                       |            |
|----|-------------------------------------------------------------------------------------------------------------------------------------------------------------------------------------------------------------------------------------------------------|------------|
|    | "Formularies, Homeopathic as Topic"] OR [mh "Materia Medica"]                                                                                                                                                                                         |            |
| #2 | hom*opath*                                                                                                                                                                                                                                            | 1511       |
| #3 | #1 or #2                                                                                                                                                                                                                                              | 1547       |
| #4 | (clinicaltrials or trialsearch or ANZCTR or ensaiosclinicos or chictr or cris or ctri or registroclinico or clinicaltrialsregister or DRKS or IRCT or rctportal or JapicCTI or JMACCT or jRCT or UMIN or trialregister or PACTR or REPEC or SLCTR):so | 37117<br>5 |
| #5 | conference abstract:pt or abstract:so                                                                                                                                                                                                                 | 17869<br>7 |
| #6 | #3 not (#4 or #5) with Publication Year from 2013 to 2021, in Trials                                                                                                                                                                                  | 218        |

## Ovid AMED (Allied and Complementary Medicine) 1985 to July 2021

| #  | Searches                                                                    | Results |
|----|-----------------------------------------------------------------------------|---------|
| 1  | exp homeopathy/                                                             | 13017   |
| 2  | hom*opath*.af.                                                              | 17889   |
| 3  | 1 or 2                                                                      | 18195   |
| 4  | exp animals/ not humans/                                                    | 13697   |
| 5  | 3 not 4                                                                     | 17865   |
| 6  | randomized controlled trials/ or double blind method/ or random allocation/ | 3842    |
| 7  | placebos/                                                                   | 734     |
| 8  | (random* or placebo?).af.                                                   | 24042   |
| 9  | 6 or 7 or 8                                                                 | 24176   |
| 10 | 5 and 9                                                                     | 525     |
| 11 | limit 10 to yr="2013 -Current"                                              | 70      |

CORE-Hom (<https://www.carstens-stiftung.de/datenbanken-zur-integrativen-medizin.html#/>)

|                                   |            |
|-----------------------------------|------------|
| Search 1                          |            |
| Sequence generation:              | randomised |
| Year:                             | 2013-2021  |
| Number of results                 | 32         |
| Search 2                          |            |
| Full text search in references:   | randomized |
| Year:                             | 2013-2021  |
| Number of results                 | 17         |
| After Search 1 duplicates removed | 1          |
| Full text search in references:   | randomized |
| Year:                             | 2013-2021  |
| Number of results                 | 6          |
| After Search 1 duplicates removed | 0          |

## Scopus.com

| History Count | Search Terms                          | Results                    |
|---------------|---------------------------------------|----------------------------|
| 1             | TITLE-ABS-KEY ( hom*opath* )          | 15,489 document results    |
| 2             | TITLE-ABS-KEY ( random* OR placebo* ) | 2,889,031 document results |

|    |                                                                                                                                                                                                                                                                                                                                                                                                                                                                                                                                                                                                                                                                                                                                                                                                                        |                             |
|----|------------------------------------------------------------------------------------------------------------------------------------------------------------------------------------------------------------------------------------------------------------------------------------------------------------------------------------------------------------------------------------------------------------------------------------------------------------------------------------------------------------------------------------------------------------------------------------------------------------------------------------------------------------------------------------------------------------------------------------------------------------------------------------------------------------------------|-----------------------------|
| 3  | ( TITLE-ABS-KEY ( hom*opath* ) ) AND ( TITLE-ABS-KEY ( random* OR placebo* ) )                                                                                                                                                                                                                                                                                                                                                                                                                                                                                                                                                                                                                                                                                                                                         | 2,396 document results      |
| 5  | PUBYEAR > 2012                                                                                                                                                                                                                                                                                                                                                                                                                                                                                                                                                                                                                                                                                                                                                                                                         | 27,077,451 document results |
| 6  | (( TITLE-ABS-KEY ( hom*opath* ) ) AND ( TITLE-ABS-KEY ( random* OR placebo* ) )) AND ( PUBYEAR > 2012 )                                                                                                                                                                                                                                                                                                                                                                                                                                                                                                                                                                                                                                                                                                                | 716 document results        |
| 7  | (( TITLE-ABS-KEY ( hom*opath* ) ) AND ( TITLE-ABS-KEY ( random* OR placebo* ) )) AND ( PUBYEAR > 2012 ) AND ( EXCLUDE ( DOCTYPE , "re" ) OR EXCLUDE ( DOCTYPE , "le" ) OR EXCLUDE ( DOCTYPE , "ed" ) OR EXCLUDE ( DOCTYPE , "no" ) OR EXCLUDE ( DOCTYPE , "sh" ) OR EXCLUDE ( DOCTYPE , "cp" ) OR EXCLUDE ( DOCTYPE , "er" ) )                                                                                                                                                                                                                                                                                                                                                                                                                                                                                         | 486 document results        |
| 8  | (( TITLE-ABS-KEY ( hom*opath* ) ) AND ( TITLE-ABS-KEY ( random* OR placebo* ) )) AND ( PUBYEAR > 2012 ) AND ( EXCLUDE ( DOCTYPE , "re" ) OR EXCLUDE ( DOCTYPE , "le" ) OR EXCLUDE ( DOCTYPE , "ed" ) OR EXCLUDE ( DOCTYPE , "no" ) OR EXCLUDE ( DOCTYPE , "sh" ) OR EXCLUDE ( DOCTYPE , "cp" ) OR EXCLUDE ( DOCTYPE , "er" ) ) AND ( EXCLUDE ( SUBJAREA , "VETE" ) )                                                                                                                                                                                                                                                                                                                                                                                                                                                   | 463 document results        |
| 9  | (( TITLE-ABS-KEY ( hom*opath* ) ) AND ( TITLE-ABS-KEY ( random* OR placebo* ) )) AND ( PUBYEAR > 2012 ) AND ( EXCLUDE ( DOCTYPE , "re" ) OR EXCLUDE ( DOCTYPE , "le" ) OR EXCLUDE ( DOCTYPE , "ed" ) OR EXCLUDE ( DOCTYPE , "no" ) OR EXCLUDE ( DOCTYPE , "sh" ) OR EXCLUDE ( DOCTYPE , "cp" ) OR EXCLUDE ( DOCTYPE , "er" ) ) AND ( EXCLUDE ( SUBJAREA , "VETE" ) ) AND ( EXCLUDE ( EXACTKEYWORD , "Animals" ) OR EXCLUDE ( EXACTKEYWORD , "Mouse" ) OR EXCLUDE ( EXACTKEYWORD , "Animal Model" ) OR EXCLUDE ( EXACTKEYWORD , "Animal Tissue" ) )                                                                                                                                                                                                                                                                     | 427 document results        |
| 10 | TITLE ( animal* OR mouse OR mice OR rat OR rats OR cat OR cats OR dog OR dogs OR cow OR cows OR sheep OR veterinarian* ) OR KEY ( animal* OR mouse OR mice OR rat OR rats OR cat OR cats OR dog OR dogs OR cow OR cows OR sheep OR veterinarian* )                                                                                                                                                                                                                                                                                                                                                                                                                                                                                                                                                                     | 7,785,592 document results  |
| 11 | (( ( TITLE-ABS-KEY ( hom*opath* ) ) AND ( TITLE-ABS-KEY ( random* OR placebo* ) ) ) AND ( PUBYEAR > 2012 ) ) AND NOT ( TITLE ( animal* OR mouse OR mice OR rat OR rats OR cat OR cats OR dog OR dogs OR cow OR cows OR sheep OR veterinarian* ) OR KEY ( animal* OR mouse OR mice OR rat OR rats OR cat OR cats OR dog OR dogs OR cow OR cows OR sheep OR veterinarian* ) ) AND ( EXCLUDE ( DOCTYPE , "re" ) OR EXCLUDE ( DOCTYPE , "le" ) OR EXCLUDE ( DOCTYPE , "ed" ) OR EXCLUDE ( DOCTYPE , "no" ) OR EXCLUDE ( DOCTYPE , "sh" ) OR EXCLUDE ( DOCTYPE , "cp" ) OR EXCLUDE ( DOCTYPE , "er" ) ) AND ( EXCLUDE ( SUBJAREA , "VETE" ) ) AND ( EXCLUDE ( EXACTKEYWORD , "Animals" ) OR EXCLUDE ( EXACTKEYWORD , "Mouse" ) OR EXCLUDE ( EXACTKEYWORD , "Animal Model" ) OR EXCLUDE ( EXACTKEYWORD , "Animal Tissue" ) ) | 413 document results        |

Supplement Table 2: Registration characteristics and publication identifiers of included trials (created by authors)

| Registration number | Registry                    | Registration Year | Title                                                                                                                                                                                      | Timing of registration | Published                                                           |
|---------------------|-----------------------------|-------------------|--------------------------------------------------------------------------------------------------------------------------------------------------------------------------------------------|------------------------|---------------------------------------------------------------------|
| NCT00065702         | ClinicalTrials.gov          | 2003              | Biomarkers of Homeopathy in Fibromyalgia                                                                                                                                                   | Retrospective          | PMID: 14734789                                                      |
| ISRCTN92205535      | ICTRP                       | 2004              | Treating patients with dyspepsia with acupuncture and homeopathy: a randomised pilot study of effectiveness and costs.                                                                     | Prospective            | PMID: 12801492                                                      |
| NCT00152776         | ClinicalTrials.gov          | 2005              | Treating Climacteric Symptoms with a Complex Homeopathic Remedy                                                                                                                            | Retrospective          | PMID: 22017387                                                      |
| ISRCTN09712705      | ICTRP                       | 2005              | Are the therapeutic effects of homeopathy attributed to the consultation, the homeopathic remedy or both? An exploratory randomised controlled trial in rheumatoid arthritis (RA) patients | Retrospective          | PMID: 21076131                                                      |
| ACTRN1260500256673  | ICTRP                       | 2005              | The Effects of Individualised and Complex Homeopathic Treatment in Osteoarthritis using a Not publishedvel Research design                                                                 | Retrospective          | Not published                                                       |
| NCT00409071         | ClinicalTrials.gov          | 2006              | Placebo-controlled Evaluation of Cocculine® Efficacy in the Management of Nausea After Chemotherapy in Breast Cancer.                                                                      | Retrospective          | PMID: 23244208                                                      |
| NCT00279513         | ClinicalTrials.gov          | 2006              | TRAUMEEL S in Reducing Pain After Correction of Hallux Valgus-Clinical Trial                                                                                                               | Prospective            | PMID: 20380750                                                      |
| NCT00307892         | ClinicalTrials.gov          | 2006              | Traumeel S for Reduction of Post Operative Pain Following Arthroscopy                                                                                                                      | Prospective            | Not published                                                       |
| NCT00358774         | ClinicalTrials.gov          | 2006              | Efficacy of Homeopathic Nasal Formulation for Management of Experimental RhiNot publishedviral Colds                                                                                       | Prospective            | Not published                                                       |
| NCT00351013         | ClinicalTrials.gov          | 2006              | The Use of Homeopathic-Based Treatment Approaches to Reduce the Prevalence of Malaria in Depressed Communities                                                                             | Prospective            | Not published                                                       |
| NCT00410332         | ClinicalTrials.gov          | 2006              | Traumeel for Post-Tonsillectomy Pain                                                                                                                                                       | Prospective            | Not published                                                       |
| 2005-004511-29      | EU Clinical Trials Register | 2006              | Pilot Study of Homeopathic Treatment of Fibromyalgia Syndrome (HOFs)                                                                                                                       | Prospective            | Not published                                                       |
| NCT00584597         | ClinicalTrials.gov          | 2007              | A Trial of Homeopathic Medication TRAUMEEL S for the Treatment of Radiation-Induced Mucositis (TRAUMEEL)                                                                                   | Retrospective          | Not published                                                       |
| NCT00725569         | ClinicalTrials.gov          | 2008              | Homeopathy for Post-operative (C. Section) Recovery                                                                                                                                        | Prospective            | Not published                                                       |
| NCT00895453         | ClinicalTrials.gov          | 2009              | Monthly Itraconazole Versus Classic Homeopathy for Treatment of Recurrent Vulvovaginal Candidiasis (RVVC)                                                                                  | Retrospective          | PMID: 19583713                                                      |
| NCT00861432         | ClinicalTrials.gov          | 2009              | Evaluation of Questionnaires of Tumor Patients With and Without Additive Homeopathic Therapy                                                                                               | Retrospective          | PMID: 26051564                                                      |
| NCT00822406         | ClinicalTrials.gov          | 2009              | Effectiveness of Individualized Homeopathic Treatment in Perennial Allergic Rhinitis                                                                                                       | Prospective            | Int J High Dilution Res 2009; 8(29): 155-172                        |
| NCT00931905         | ClinicalTrials.gov          | 2009              | Homeopathic Preparation Plumbum Metallicum for Lead Poisoning                                                                                                                              | During enrollment      | PMID: 21784327                                                      |
| NCT00914329         | ClinicalTrials.gov          | 2009              | Gelsemium Sempervirens in Anticipatory Anxiety (ANXIHOMEV)                                                                                                                                 | Prospective            | PMID: 21954883                                                      |
| NCT01003210         | ClinicalTrials.gov          | 2009              | Homeopathic Ear Drops for Otitis Media Study                                                                                                                                               | Prospective            | PMID: 27335917                                                      |
| NCT00942097         | ClinicalTrials.gov          | 2009              | Homeopathic Medication and Nutritional Oriented Diet to Treat                                                                                                                              | Prospective            | <a href="https://www.teses.usp.br/t">https://www.teses.usp.br/t</a> |

| Registration number | Registry                    | Registration Year | Title                                                                                                                                                                          | Timing of registration | Published                                                                                                                                                       |
|---------------------|-----------------------------|-------------------|--------------------------------------------------------------------------------------------------------------------------------------------------------------------------------|------------------------|-----------------------------------------------------------------------------------------------------------------------------------------------------------------|
|                     |                             |                   | Overweight Pregnant Women with Mental Disorder                                                                                                                                 |                        | eses/disponiveis/5/5137/td<br>e-18012013-<br>154242/en.php                                                                                                      |
| NCT01048411         | ClinicalTrials.gov          | 2009              | Trial to Investigate the Influence of the Homeopathic Remedy Naja-comp on Stroke Therapy in Geriatric Rehabilitation (naja-comp)                                               | Retrospective          | Not published                                                                                                                                                   |
| NCT01246427         | ClinicalTrials.gov          | 2010              | Evaluation of Homeopathic Treatment for Hot Flashes in Not publishedn Metastatic Breast Cancer (HBC)                                                                           | Retrospective          | PMID: 30194492                                                                                                                                                  |
| NCT01061229         | ClinicalTrials.gov          | 2010              | Homeopathic Drug Proving Trial (HAMSV)                                                                                                                                         | Prospective            | PMID: 23561008                                                                                                                                                  |
| NCT01242592         | ClinicalTrials.gov          | 2010              | Homeopathy as an Adjuvant to Chemotherapy Improves Clinical Outcome in Relapsed Pulmonary Tuberculosis                                                                         | Retrospective          | Not published                                                                                                                                                   |
| NCT01156194         | ClinicalTrials.gov          | 2010              | Homeopathic Remedy for the Third Stage of Delivery                                                                                                                             | Prospective            | Not published                                                                                                                                                   |
| NCT01257503         | ClinicalTrials.gov          | 2010              | Homeopathic Cold Remedy for Children Study                                                                                                                                     | Prospective            | PMID: 27912951                                                                                                                                                  |
| NCT01049373         | ClinicalTrials.gov          | 2010              | Efficacy and Safety of Lymphdiaral Basistropfen (HDC) in the Treatment of Chronic Low-back Pain (144)                                                                          | Retrospective          | PMID: 23424755                                                                                                                                                  |
| NCT01426061         | ClinicalTrials.gov          | 2011              | Clinical Effect of Reflexology and Homeopathy Added to Conventional Asthma Management                                                                                          | Retrospective          | PMID: 32944201                                                                                                                                                  |
| NCT01477502         | ClinicalTrials.gov          | 2011              | Clinical Value of Homeopathic Prophylaxis of Recurrent Urinary Tract Infections in Persons With Spinal Cord Injury                                                             | Prospective            | PMID: 29485355                                                                                                                                                  |
| NCT01460043         | ClinicalTrials.gov          | 2011              | Trial of Homeopathy on Management of MeNot publishedrrhagia                                                                                                                    | Retrospective          | Not published                                                                                                                                                   |
| NCT01315041         | ClinicalTrials.gov          | 2011              | "Pi" and Hot Flashes                                                                                                                                                           | Prospective            | PMID: 30736083                                                                                                                                                  |
| NCT01635218         | ClinicalTrials.gov          | 2012              | Homeopathic Treatment for Depression in Peri- and PostmeNot publishedpausal Women (HOMDEP-MENOT PUBLISHEDP)                                                                    | Retrospective          | PMID: 25768800                                                                                                                                                  |
| NCT01598909         | ClinicalTrials.gov          | 2012              | Efficacy of Arnica D1 Ointment After Upper Blepharoplasty (ARINE)                                                                                                              | Prospective            | PMID: 27348641                                                                                                                                                  |
| NCT01658059         | ClinicalTrials.gov          | 2012              | Reducing Children's Anxiety Using Homeopathic Remedy Before Dental Treatment                                                                                                   | Prospective            | J Oral Health Dent.<br>2018;1(1):001                                                                                                                            |
| NCT01651715         | ClinicalTrials.gov          | 2012              | Efficacy and Safety Study of Homeopathic Oral Antibodies to Treat Viral Upper Respiratory Tract Infections (ESTUAR)                                                            | Prospective            | <a href="https://www.scirp.org/html/12-1950209_62216.htm">https://www.scirp.org/html/12-1950209_62216.htm</a>                                                   |
| NCT02255136         | ClinicalTrials.gov          | 2012              | Efficacy Study of Homeopathic Medicines in Treatment of Allergic Rhinitis and/or Induced Bronchial Asthma (SBRCTHILARBA)                                                       | Prospective            | Not published                                                                                                                                                   |
| 2011-006086-17      | EU Clinical Trials Register | 2012              | Effectiveness of homeopathic treatment (Agraphis nutans 5CH, Thuya occidentalis 5CH, Kalium muriaticum and Arsenicum iodatum 9CH 9CH) as adjuvant secretory otitis in children | Prospective            | PMID: 27497418                                                                                                                                                  |
| CTRI/2012/02/002449 | ICTRP                       | 2012              | Homeopathy drug proving study to observe clinical symptoms of CP-010 in healthy volunteers                                                                                     | Retrospective          | PMID: 25060156                                                                                                                                                  |
| CTRI/2012/02/002450 | ICTRP                       | 2012              | Comparator clinical trial of CP-010 with Magnesium Phosphoricum in sub-chronic & chronic painful conditions                                                                    | Retrospective          | <a href="https://www.askdrshah.com/manage/articles/pdf/8.%20Caps%20CT%20Journal%20">https://www.askdrshah.com/manage/articles/pdf/8.%20Caps%20CT%20Journal%</a> |

| Registration number | Registry           | Registration Year | Title                                                                                                                 | Timing of registration | Published                                                                                                                                                                                                                                                                                                                                                 |
|---------------------|--------------------|-------------------|-----------------------------------------------------------------------------------------------------------------------|------------------------|-----------------------------------------------------------------------------------------------------------------------------------------------------------------------------------------------------------------------------------------------------------------------------------------------------------------------------------------------------------|
|                     |                    |                   |                                                                                                                       |                        | <a href="#">20of%20Pain%20managem ent.pdf</a>                                                                                                                                                                                                                                                                                                             |
| CTRI/2012/03/002506 | ICTRP              | 2012              | Homeopathy drug proving study to observe clinical symptoms of H-009 in healthy volunteers                             | Retrospective          | <a href="https://www.ijrh.org/article.asp?issn=0974-7168;year=2013;volume=7;issue=2;spage=47;epage=61;aulast=Shah">https://www.ijrh.org/article.asp?issn=0974-7168;year=2013;volume=7;issue=2;spage=47;epage=61;aulast=Shah</a>                                                                                                                           |
| IRCT201207063706N14 | ICTRP              | 2012              | Effect of homeopathy on the pain, menstrual symptoms and quality of life in patients with primary dysmenorrhoea       | During enrollment      | PMID: 28144456                                                                                                                                                                                                                                                                                                                                            |
| NCT01983592         | ClinicalTrials.gov | 2013              | An N-of-1 Study of Homeopathic Treatment of Fatigue in Patients Receiving Chemotherapy                                | Prospective            | PMID: 29734461                                                                                                                                                                                                                                                                                                                                            |
| NCT01921777         | ClinicalTrials.gov | 2013              | Effects of Traumeel®S Tablets on Recovery and Inflammatory Immune Response After Repeated Bouts of Exercise           | Retrospective          | PMID: 28224232                                                                                                                                                                                                                                                                                                                                            |
| NCT01905735         | ClinicalTrials.gov | 2013              | A Safety and Efficacy of Homeopathic Medicine Rhus Toxicodendron 30 in the Treatment of Rheumatoid Arthritis          | Prospective            | Not published                                                                                                                                                                                                                                                                                                                                             |
| CTRI/2013/08/003899 | ICTRP              | 2013              | Homeopathy in headache                                                                                                | Retrospective          | Not published                                                                                                                                                                                                                                                                                                                                             |
| IRCT2013011912175N1 | ICTRP              | 2013              | Treatment of depression by integration of Homeopathy to conventional Medicine                                         | During enrollment      | Not published                                                                                                                                                                                                                                                                                                                                             |
| CTRI/2013/08/003926 | ICTRP              | 2013              | Homeopathy in osteoarthritis knee                                                                                     | Retrospective          | Not published                                                                                                                                                                                                                                                                                                                                             |
| NCT02207998         | ClinicalTrials.gov | 2014              | Efficacy of Homoeopathy and Physiotherapy in Chronic Low Back Pain Due to Osteoarthritis                              | Retrospective          | PMID: 26773321                                                                                                                                                                                                                                                                                                                                            |
| NCT02124473         | ClinicalTrials.gov | 2014              | Addition of Homeopathy in Patients With Resistant Arterial Hypertension                                               | Retrospective          | Not published                                                                                                                                                                                                                                                                                                                                             |
| NCT02138474         | ClinicalTrials.gov | 2014              | The Efficacy of Lacticum Acidum Homaccord in the Treatment of Chronic Tension-type Headaches                          | Retrospective          | <a href="https://scholar.google.de/scholar?hl=de&amp;as_sdt=0%2C5&amp;q=The+Efficacy+of+Lacticum+Acidum+Homaccord+in+the+Treatment+of+Chronic+Tension-type+Headaches&amp;btnG=">https://scholar.google.de/scholar?hl=de&amp;as_sdt=0%2C5&amp;q=The+Efficacy+of+Lacticum+Acidum+Homaccord+in+the+Treatment+of+Chronic+Tension-type+Headaches&amp;btnG=</a> |
| NCT02208726         | ClinicalTrials.gov | 2014              | The Effect of Picricum Acidum and Phosphoricum Acidum Homaccord on Perceived Levels of Anxiety in University Students | Retrospective          | <a href="https://scholar.google.com/scholar?hl=de&amp;as_sdt=0%2C5&amp;q=The+Effect+of+Picricum+Acidum+and+Phosphoricum+Acidum+Homaccord+on+Perceived+Levels+of+">https://scholar.google.com/scholar?hl=de&amp;as_sdt=0%2C5&amp;q=The+Effect+of+Picricum+Acidum+and+Phosphoricum+Acidum+Homaccord+on+Perceived+Levels+of+</a>                             |

| Registration number | Registry           | Registration Year | Title                                                                                                                                                                   | Timing of registration | Published                                                                                               |
|---------------------|--------------------|-------------------|-------------------------------------------------------------------------------------------------------------------------------------------------------------------------|------------------------|---------------------------------------------------------------------------------------------------------|
|                     |                    |                   |                                                                                                                                                                         |                        | Anxiety+in+University+Students&btnG=                                                                    |
| NCT02504515         | ClinicalTrials.gov | 2015              | Effect of Homeopathy, Acupuncture or Anthroposophic Medicine in Women's Quality of Life                                                                                 | During enrollment      | PMID: 33662995                                                                                          |
| NCT02427386         | ClinicalTrials.gov | 2015              | Homeopathic Treatment of Chronic Pelvic Pain in Women With Endometriosis                                                                                                | Retrospective          | PMID: 28187404                                                                                          |
| NCT02402049         | ClinicalTrials.gov | 2015              | Homeopathic Treatment of Premenstrual Syndrome                                                                                                                          | Prospective            | PMID: 31434111                                                                                          |
| NCT02515006         | ClinicalTrials.gov | 2015              | Impact of Homeopathy for Persistent Insomnia in Patients With Cancer                                                                                                    | Retrospective          | Not published                                                                                           |
| NCT02419235         | ClinicalTrials.gov | 2015              | The Effect of a Homeopathic Complex on Blood Pressure in Refractory Hypertension                                                                                        | Retrospective          | <a href="https://core.ac.uk/download/pdf/74247557.pdf">https://core.ac.uk/download/pdf/74247557.pdf</a> |
| RBR-2zxcwz          | ICTRP              | 2015              | Homeopathy in the cocaine-crack dependence                                                                                                                              | During enrollment      | PMID: 29625852                                                                                          |
| RBR-6y5dcb          | ICTRP              | 2015              | Homeopathy versus Sertraline for depression                                                                                                                             | During enrollment      | Not published                                                                                           |
| NCT02870543         | ClinicalTrials.gov | 2016              | Efficacy of Phytolacca Decandra and Melissa Officinalis in Children With Nocturnal Bruxism                                                                              | Retrospective          | PMID: 30831467                                                                                          |
| NCT02890316         | ClinicalTrials.gov | 2016              | Assessment of Fatigue During Radiotherapy for Breast Cancer With and Without Homeopathy Treatment                                                                       | Prospective            | PMID: 34027702                                                                                          |
| NCT02690935         | ClinicalTrials.gov | 2016              | Efficacy of 2LALERG (Homeopathic Drug) in Allergic Rhinitis Related to Grass Pollen (LLB-2016-01)                                                                       | Prospective            | Not published                                                                                           |
| RBR-6xts8z          | ICTRP              | 2017              | Homeopathy in the discontinuation of inhaled corticosteroid during the treatment of teenagers with perennial asthma                                                     | During enrollment      | PMID: 29579763                                                                                          |
| CTRI/2017/02/007949 | ICTRP              | 2017              | A clinical trial to study the effects of three different toothpastes (Herbal toothpaste, Homeopathy toothpaste and regular toothpaste) in prevention of dental diseases | Retrospective          | Not published                                                                                           |
| NCT03512639         | ClinicalTrials.gov | 2018              | Arnica Montana and Bellis Perennis for Prevention of Seroma After Mastectomy (HOM)                                                                                      | Retrospective          | Embase L2004035444                                                                                      |

ICTRP: International Clinical Trials Registry Platform; PMID: PubMed Identification

Supplement Table 3: Publication characteristics and registration status of included randomized controlled trials (created by authors)

| First author   | Publication year | Title                                                                                                                                                                                                                         | DOI                             | Registration             |
|----------------|------------------|-------------------------------------------------------------------------------------------------------------------------------------------------------------------------------------------------------------------------------|---------------------------------|--------------------------|
| Adi            | 2020             | Effect of syzygium cumini in type 2 diabetes mellitus by assessing glycosylated haemoglobin and blood glucose levels: a double blind randomized controlled trial                                                              | Not available                   | No registration detected |
| Adkinson       | 2010             | The effect of topical arnica on muscle pain. <i>Annals of Pharmacotherapy</i>                                                                                                                                                 | 10.1345/aph.1P071               | NCT00504010              |
| Adler          | 2011             | Homeopathic individualized Q-potencies versus fluoxetine formoderate to severe depression: double-blind, randomized non-inferiority trial                                                                                     | 10.1093/ecam/nep114             | No registration detected |
| Adler          | 2013             | Homeopathy for depression: A randomized, partially double-blind, placebo-controlled, four-armed study (DEP-HOM)                                                                                                               | 10.1186/1745-6215-12-43         | NCT01178255.             |
| Adler          | 2013             | Homeopathy in crack-cocaine craving: Randomized, placebo controlled, double-blind study (COCACRACK study)                                                                                                                     | 10.1590/S0101-60832013000600006 | RBR-67zvt5               |
| Adler          | 2018             | Double-blind evaluation of homeopathy on cocaine craving: a randomized controlled pilot study                                                                                                                                 | 10.1016/j.joim.2018.03.004      | RBR-2xzcwz               |
| Andrade        | 2019             | Efficacy of a Homeopathic Medicine of Capsicum frutescens L. (Solanaceae) in the Treatment of Hot Flashes in Menopausal Women: A Phase-2 Randomized Controlled Trial                                                          | 10.1055/s-0038-1676326          | NCT 01315041             |
| Baker          | 2003             | The effects of homeopathic Argentum nitricum on test anxiety.                                                                                                                                                                 | 10.1016/s0965-2299(03)00059-1   | No registration detected |
| Bandera Fisher | 2015             | Agnus Castus and breastfeeding                                                                                                                                                                                                | Not available                   | No registration detected |
| Bell           | 2004             | Improved clinical status in fibromyalgia patients treated with individualized homeopathic remedies versus placebo                                                                                                             | 10.1093/rheumatology/keh111     | NCT00065702              |
| Bell           | 2004             | Individual differences in response to randomly assigned active individualized homeopathic and placebo treatment in fibromyalgia: implications of a double-blinded optional crossover design.                                  | 10.1089/107555304323062266      | NCT00065702              |
| Bell           | 2004             | Electroencephalographic cordance patterns distinguish exceptional clinical responders with fibromyalgia to individualized homeopathic medicines                                                                               | 10.1089/107555304323062275      | NCT00065702              |
| Bell           | 2004             | EEG alpha sensitization in individualized homeopathic treatment of fibromyalgia                                                                                                                                               | 10.1080/00207450490475724       | NCT00065702              |
| Bell           | 2012             | Multiweek resting EEG cordance change patterns from repeated olfactory activation with two constitutionally salient homeopathic remedies in healthy young adults                                                              | 10.1089/acm.2011.0931           | No registration detected |
| Bell           | 2013             | Acute electroencephalographic effects from repeated olfactory administration of homeopathic remedies in individuals with self-reported chemical sensitivity                                                                   | Not available                   | No registration detected |
| Belon          | 2006             | Can administration of potentized homeopathic remedy, Arsenicum album, alter antinuclear antibody (ANA) titre in people living in high-risk arsenic contaminated areas? I. A correlation with certain hematological parameters | 10.1093/ecam/nek013             | No registration detected |



| First author | Publication year | Title                                                                                                                                                                                       | DOI                              | Registration             |
|--------------|------------------|---------------------------------------------------------------------------------------------------------------------------------------------------------------------------------------------|----------------------------------|--------------------------|
| Belon        | 2007             | Homeopathic remedy for arsenic toxicity? Evidence-based findings from a randomized placebo-controlled double blind human trial.                                                             | 10.1016/j.scitotenv.2007.06.001  | No registration detected |
| Bernstein    | 2006             | Treatment of mild to moderate psoriasis with Reliéva, a Mahonia aquifolium extract - a double-blind, placebo-controlled study.                                                              | 10.1097/00045391-200603000-00007 | No registration detected |
| Bernstein    | 2011             | A randomized, double-blind, parallel trial comparing capsaicin nasal spray with placebo in subjects with a significant component of nonallergic rhinitis                                    | 10.1016/j.anai.2011.05.016       | No registration detected |
| Bonne        | 2003             | A randomized, double-blind, placebo-controlled study of classical homeopathy in generalized anxiety disorder                                                                                | 10.4088/jcp.v64n0309             | No registration detected |
| Brien        | 2011             | Homeopathy has clinical benefits in rheumatoid arthritis patients that are attributable to the consultation process but not the homeopathic remedy: a randomized controlled clinical trial. | 10.1093/rheumatology/keq234      | ISRCTN09712705           |
| Brinkhaus    | 2006             | Homeopathic arnica therapy in patients receiving knee surgery: results of three randomised double-blind trials                                                                              | 10.1016/j.ctim.2006.04.004       | No registration detected |
| Cavalcanti   | 2003             | Effects of homeopathic treatment on pruritus of haemodialysis patients: a randomized placebo-controlled double-blind trial                                                                  | 10.1016/j.homp.2003.07.002       | No registration detected |
| Chaiet       | 2016             | Perioperative Arnica montana for Reduction of Ecchymosis in Rhinoplasty Surgery                                                                                                             | 10.1097/sap.0000000000000312     | NCT01164644              |
| Chakraborty  | 2013             | Effect of individualized homeopathic treatment in influenza like illness: A multicenter, single blind, randomized, placebo controlled study                                                 | 10.4103/0974-7168.114268         | CTRI/2012/04/002590      |
| Chakraborty  | 2013             | Effect of homeopathic LM potencies in acute attacks of haemorrhoidal disease: A multicentric randomized single-blind placebo-controlled trial.                                              | 10.4103/0974-7168.116630         | CTRI/2012/04/002541.     |
| Chakraborty  | 2015             | A comparative study of homeopathic medicine – Sulphur with the Multidrug therapy in the treatment of paucibacillary leprosy                                                                 | 10.4103/0974-7168.166375         | CTRI/2008/091/000080     |
| Champs       | 2021             | Impact of Homeopathic Treatment on the Quality of Life of Women with Chronic Diseases: A Randomized Controlled Pragmatic Trial                                                              | 10.1055/s-0040-1721062           | NCT02504515*             |
| Chand        | 2014             | Homeopathic treatment in addition to standard care in multi drug resistant pulmonary tuberculosis: a randomized, double blind, placebo controlled clinical trial                            | 10.1016/j.homp.2013.12.003       | No registration detected |
| Charandabi   | 2016             | Effect of Homeopathy on Pain Intensity and Quality Of Life of Students With Primary Dysmenorrhea: A Randomized Controlled Trial                                                             | 10.5812/ircmj.30902              | IRCT201207063706N14      |
| Chauhan      | 2014             | Efficacy of homeopathic intervention in subclinical hypothyroidism with or without autoimmune thyroiditis in children: an exploratory randomized control study                              | 10.1016/j.homp.2014.08.004       | No registration detected |
| Colau        | 2012             | Efficacy of a non-hormonal treatment, BRN-01, on menopausal hot flashes: a multicenter, randomized, double-blind, placebo-controlled trial                                                  | 10.2165/11640240-000000000-00000 | 2009-016959-21           |
| Cornu        | 2010             | No effect of a homeopathic combination of Arnica montana and Bryonia alba on bleeding, inflammation, and ischaemia after aortic valve surgery.                                              | 10.1111/j.1365-2125.2009.03574.x | NCT00774293              |

| First author | Publication year | Title                                                                                                                                                                                                                              | DOI                           | Registration             |
|--------------|------------------|------------------------------------------------------------------------------------------------------------------------------------------------------------------------------------------------------------------------------------|-------------------------------|--------------------------|
| Danno        | 2014             | China rubra for side-effects of quinine: a prospective, randomised study in pregnant women with malaria in Cotonou, Benin                                                                                                          | 10.1016/j.homp.2014.03.002    | No registration detected |
| Das          | 2019             | Comparative evaluation of analgesic and anti-inflammatory efficacy of ibuprofen and traumeel after periodontal flap surgery: A randomized triple-blind clinical trial                                                              | 10.4103/jisp.jisp_85_19       | No registration detected |
| Daub         | 2005             | Homeopathic antiemesis for chemotherapy, a prospective randomised trial [Homöopathische Antiemetika bei Chemotherapie, eine prospektiv, randomisierte Studie].                                                                     | Not available                 | No registration detected |
| Dean         | 2012             | Homeopathy for mental fatigue: lessons from a randomized, triple blind, placebo-controlled cross-over clinical trial                                                                                                               | 10.1186/1472-6882-12-167      | ISRCTN16521161           |
| Dey          | 2021             | A Randomized, Double-Blind, Placebo-Controlled, Pilot Trial of Individualized Homeopathic Medicines for Cutaneous Warts                                                                                                            | 10.1055/s-0040-1722232        | CTRI/2019/10/021659      |
| Dey          | 2021             | Efficacy of Individualized Homeopathic Medicines in the Treatment of Atopic Dermatitis in Adults: A Double-Blind, Randomized, Placebo-Controlled, Preliminary Trial                                                                | 10.1159/000516026             | CTRI/2019/02/017576      |
| Dolev        | 2021             | Attention Dysregulation in Breast Cancer Patients Following a Complementary Alternative Treatment Routine: A Double-Blind Randomized Trial                                                                                         | 10.1177/15347354211019470     | NCT02890316              |
| Dossett      | 2015             | Patient-Provider Interactions Affect Symptoms in Gastroesophageal Reflux Disease: A Pilot Randomized, Double-Blind, Placebo-Controlled Trial                                                                                       | 10.1371/journal.pone.0136855  | NCT01915173              |
| Dutta        | 2021             | Efficacy of individualized homeopathic medicines in intervening the progression of pre-hypertension to hypertension: A double-blind, randomized, placebo-controlled trial                                                          | 10.1016/j.explore.2021.05.007 | CTRI/2018/10/016,026     |
| Erkan        | 2019             | The efficacy of homeopathic Arnica Montana 200 CH on dental surgical treatments: A double-blind, placebo-controlled study                                                                                                          | 10.18621/eurj.417262          | No registration detected |
| Ferrara      | 2008             | Homotoxicological remedies versus desmopressin versus placebo in the treatment of enuresis: a randomised, double-blind, controlled trial                                                                                           | 10.1007/s00467-007-0440-3     | No registration detected |
| Fibert       | 2019             | Rethinking ADHD intervention trials: feasibility testing of two treatments and a methodology                                                                                                                                       | 10.1007/s00431-019-03374-z    | ISRCTN17723526           |
| Fisher       | 2006             | Evaluation of specific and non-specific effects in homeopathy: Feasibility study for a randomised trial                                                                                                                            | 10.1016/j.homp.2006.07.006    | No registration detected |
| Frass        | 2005             | Influence of potassium dichromate on tracheal secretions in critically ill patients                                                                                                                                                | 10.1378/chest.127.3.936       | No registration detected |
| Frass        | 2011             | Adjunctive homeopathic treatment in patients with severe sepsis: a randomized, double-blind, placebo-controlled trial in an intensive care unit                                                                                    | 10.1016/j.homp.2011.02.013    | No registration detected |
| Frass        | 2015             | Influence of adjunctive classical homeopathy on global health status and subjective wellbeing in cancer patients – A pragmatic randomized controlled trial.                                                                        | 10.1016/j.ctim.2015.03.004    | NCT00861432              |
| Frass        | 2021             | Homeopathic Treatment as an Add-On Therapy May Improve Quality of Life and Prolong Survival in Patients with Non-Small Cell Lung Cancer: A Prospective, Randomized, Placebo-Controlled, Double-Blind, Three-Arm, Multicenter Study | 10.1002/onco.13693            | NCT01509612              |

| First author     | Publication year | Title                                                                                                                                                                                                                                          | DOI                             | Registration             |
|------------------|------------------|------------------------------------------------------------------------------------------------------------------------------------------------------------------------------------------------------------------------------------------------|---------------------------------|--------------------------|
| Frei             | 2005             | Homeopathic treatment of children with attention deficit hyperactivity disorder: a randomized, double blind, placebo controlled crossover trial                                                                                                | 10.1007/s00431-005-1735-7       | No registration detected |
| Friese           | 2007             | Homeopathy in acute rhinosinusitis. A double-blind, placebo controlled study shows the efficiency and tolerability of a homeopathic combination remedy                                                                                         | 10.1007/s00106-006-1480-x       | No registration detected |
| Furuta           | 2003             | Prospective, randomized, double-blind clinical trial about efficacy of homeopathic treatment in children with obstructive adenoid                                                                                                              | 10.1590/S0034-72992003000300008 | No registration detected |
| Furuta           | 2007             | Homeopathic treatment of recurrent tonsillitis in children: a randomized controlled trial                                                                                                                                                      | Not available                   | No registration detected |
| Garnica-Tellez   | 2018             | Efficacy of antihomotoxic medicine in the treatment of cervical myofascial syndrome and shoulder girdle: Comparative study versus botulinum toxin type A                                                                                       | 10.20986/resed.2017.3594/2017   | No registration detected |
| Ghelman          | 2020             | A twelve-week, four-arm, randomized, double-blind, placebo-controlled, phase 2 prospective clinical trial to evaluate the efficacy and safety of an anthroposophic multimodal treatment on chronic pain in outpatients with postpolio syndrome | 10.1002/brb3.1590               | No registration detected |
| Ghosh            | 2018             | Efficacy of Arsenicum album 30cH in preventing febrile episodes following DPT-HepB-Polio vaccination - a randomized, double-blind, placebo-controlled clinical trial                                                                           | 10.1016/j.ctim.2017.11.020      | CTRI/2017/02/007939      |
| Ghosh            | 2021             | Efficacy of individualized homeopathic medicines in primary dysmenorrhea: a double-blind, randomized, placebo-controlled, clinical trial                                                                                                       | 10.1515/jcim-2020-0512          | CTRI/2018/10/016013      |
| Gmünder          | 2003             | The efficacy of homeopathy in the treatment of chronic low back pain compared to standardized physiotherapy                                                                                                                                    | 10.1055/s-2002-34004            | No registration detected |
| Gonzales de Vega | 2013             | Traumeel vs. diclofenac for reducing pain and improving ankle mobility after acute ankle sprain: A multicentre, randomised, blinded, controlled and non-inferiority trial                                                                      | 10.1111/ijcp.12219              | NCT01066520              |
| Gupta            | 2019             | Homoeopathic medicine - Sepia for the management of menopausal symptoms: A multicentric, randomised, double-blind placebo-controlled clinical trial                                                                                            | 10.4103/ijrh.ijrh_8_18          | CTRI/2011/12/002269      |
| Gupta            | 2020             | Homoeopathic therapy in cervical spondylosis pain management: A randomised, double-blind, placebo-controlled trial                                                                                                                             | 10.4103/ijrh.ijrh_70_19         | CTRI/2011/12/002270      |
| Haila            | 2005             | Effects of homeopathic treatment on salivary flow rate and subjective symptoms in patients with oral dryness: a randomized trial.                                                                                                              | 10.1016/j.homp.2005.03.002      | No registration detected |
| Harrison         | 2013             | The effect of a homeopathic complex on psychophysiological onset insomnia in males: a randomized pilot study                                                                                                                                   | Not available                   | No registration detected |
| Hellhammer       | 2013             | Effects of a homeopathic combination remedy on the acute stress response, well-being, and sleep: a double-blind, randomized clinical trial                                                                                                     | 10.1089/acm.2010.0636           | No registration detected |
| Heudel           | 2019             | Does a homeopathic medicine reduce hot flushes induced by adjuvant endocrine therapy in localized breast cancer patients? A multicenter randomized placebo-controlled phase III trial                                                          | 10.1007/s00520-018-4449-x       | NCT01246427              |
| Heusser          | 2009             | Efficacy of homeopathically potentized antimony on blood coagulation. A randomized placebo controlled crossover trial.                                                                                                                         | 10.1159/000196974               | No registration detected |

| First author | Publication year | Title                                                                                                                                                                                                                                                                                | DOI                        | Registration                    |
|--------------|------------------|--------------------------------------------------------------------------------------------------------------------------------------------------------------------------------------------------------------------------------------------------------------------------------------|----------------------------|---------------------------------|
| Hitzenberger | 2005             | The effect of a homeopathic drug on the blood pressure of hypertensive patients: a randomized double-blind, controlled, parallel-group, comparative trial                                                                                                                            | 10.1007/s10354-005-0204-2  | No registration detected        |
| Issing       | 2005             | The homeopathic preparation Vertigoheel versus Ginkgo biloba in the treatment of vertigo in an elderly population: a double-blinded, randomized, controlled clinical trial                                                                                                           | 10.1089/acm.2005.11.155    | No registration detected        |
| Jacobs       | 2005             | Homeopathy for menopausal symptoms in breast cancer survivors: a preliminary randomized controlled trial                                                                                                                                                                             | 10.1089/acm.2005.11.21     | No registration detected        |
| Jacobs       | 2005             | Homeopathy for attention-deficit/hyperactivity disorder: a pilot randomized-controlled trial. <i>Journal of Alternative and Complementary Medicine</i>                                                                                                                               | 10.1089/acm.2005.11.799    | No registration detected        |
| Jacobs       | 2006             | Homeopathic combination remedy in the treatment of acute childhood diarrhea in Honduras                                                                                                                                                                                              | 10.1089/acm.2006.12.723    | No registration detected        |
| Jacobs       | 2007             | The use of homeopathic combination remedy for dengue fever symptoms: a pilot RCT in Honduras                                                                                                                                                                                         | 10.1016/j.homp.2006.10.004 | No registration detected        |
| Jacobs       | 2016             | A randomized controlled trial of a homeopathic syrup in the treatment of cold symptoms in young children.                                                                                                                                                                            | 10.1016/j.ctim.2016.10.013 | NCT01257503                     |
| Jobst        | 2005             | Helfen intramuskuläre Eigenblutgaben bei chronisch rezidivierenden Infekten der Atemwege? – Fußangeln auf dem Weg einer randomisierten Studie. [Do autologous blood injections help against relapsing upper respiratory infections? - Traps on the way of doing a randomised trial.] | 10.1055/s-2005-836497      | No registration detected        |
| Jong         | 2015             | A randomized open comparative clinical trial on the effectiveness, safety and tolerability of a homeopathic medicinal product for the treatment of painful teething in children.                                                                                                     | 10.4172/2327-5162.1000178  | Roszdraznador: study no 567-    |
| Jong         | 2016             | Effectiveness, safety and tolerability of a complex homeopathic medicinal product in the prevention of recurrent acute upper respiratory tract infections in children: a multicenter, open, comparative, randomized, controlled clinical trial.                                      | 10.1186/s40248-016-0056-1  | Roszdraznador: study no 164-563 |
| Jong         | 2016             | A comparative randomized controlled clinical trial on the effectiveness, safety, and tolerability of a homeopathic medicinal product in children with sleep disorders and restlessness.                                                                                              | 10.1155/2016/9539030       | No registration detected        |
| Karow        | 2008             | Efficacy of Arnica montana D4 for healing of wounds after Hallux valgus surgery compared to diclofenac                                                                                                                                                                               | 10.1089/acm.2007.0560      | No registration detected        |
| Katz         | 2005             | The feasibility of a randomised, placebo-controlled clinical trial of homeopathic treatment of depression in general practice                                                                                                                                                        | 10.1016/j.homp.2005.04.002 | No registration detected        |
| Khachatryan  | 2016             | Therapy of neurotic manifestations in children: Search for alternative methods of treatment                                                                                                                                                                                          | Not available              | No registration detected        |
| Khuda-Bukhsh | 2005             | Can homeopathic arsenic remedy combat arsenic poisoning in humans exposed to groundwater arsenic contamination? A preliminary report on first human trial                                                                                                                            | 10.1093/ecam/neh124        | No registration detected        |
| Khuda-Bukhsh | 2011             | An initial report on the efficacy of a millesimal potency Arsenicum Album LM 0/3                                                                                                                                                                                                     | 10.3736/jcim2011060        | No registration                 |

| First author  | Publication year | Title                                                                                                                                                                                                               | DOI                              | Registration             |
|---------------|------------------|---------------------------------------------------------------------------------------------------------------------------------------------------------------------------------------------------------------------|----------------------------------|--------------------------|
|               |                  | in ameliorating arsenic toxicity in humans living in a high-risk arsenic village.                                                                                                                                   | 4                                | detected                 |
| Khurana       | 2020             | Ferrum phosphoricum 3X and Ferrum metallicum 3X in the treatment of iron deficiency anaemia in children: Randomized parallel arm study                                                                              | 10.4103/ijrh.ijrh_91_19          | CTRI/2019/05/019077      |
| Kim           | 2005             | Treatment of seasonal allergic rhinitis using homeopathic preparation of common allergens in the southwest region of the US: a randomized, controlled clinical trial                                                | 10.1345/aph.1E387                | No registration detected |
| Klein-Laansma | 2018             | Semi-Individualized Homeopathy Add-On Versus Usual Care Only for Premenstrual Disorders: A Randomized, Controlled Feasibility Study                                                                                 | 10.1089/acm.2017.0388            | NTR3560                  |
| Koley         | 2015             | A double-blind randomized placebo-controlled feasibility study evaluating individualized homeopathy in managing pain of knee osteoarthritis                                                                         | 10.1177/2156587214568668         | CTRI/2014/05/004589      |
| Kolia-Adam    | 2008             | The efficacy of Coffea cruda on insomnia: a double blind trial                                                                                                                                                      | Not available                    | No registration detected |
| Kotlus        | 2010             | Evaluation of homeopathic arnica montana for ecchymosis after upper blepharoplasty: A placebo-controlled, randomized, double-blind study                                                                            | 10.1097/IOP.0b013e3181cd93be     | No registration detected |
| La Pine       | 2006             | Night shift: can a homeopathic remedy alleviate shift lag?                                                                                                                                                          | 10.1097/00003465-200605000-00015 | No registration detected |
| Lewith        | 2002             | Use of ultramolecular potencies of allergen to treat asthmatic people allergic to house dust mite: double blind randomized controlled clinical trial.                                                               | 10.1136/bmj.324.7336.520         | No registration detected |
| Liu           | 2013             | Effectiveness of MORA electronic homeopathic copies of remedies for allergic rhinitis: A short-term, randomized, placebo-controlled pilot study.                                                                    | 10.1016/j.eujim.2012.10.003      | No registration detected |
| Loeb          | 2018             | A randomized, blinded, placebo-controlled trial comparing antibody responses to homeopathic and conventional vaccines in university students                                                                        | 10.1016/j.vaccine.2018.08.082    | NCT02825368              |
| Lotan         | 2020             | Arnica montana and Bellis perennis for seroma reduction following mastectomy and immediate breast reconstruction: randomized, double-blind, placebo-controlled trial                                                | 10.1007/s00238-019-01618-7       | NCT03512639              |
| Lozada        | 2017             | A double-blind, randomized, saline-controlled study of the efficacy and safety of co-administered intra-articular injections of Tr14 and Ze14 for treatment of painful osteoarthritis of the knee: The MOZArT trial | 10.1016/j.eujim.2017.07.005      | NCT01887678              |
| Macias-Cortés | 2015             | Individualized homeopathic treatment and fluoxetine for moderate to severe depression in peri- and postmenopausal women (HOMDEP-MENOP study): a randomized, double-dummy, double-blind, placebo-controlled trial    | 10.1371/journal.pone.0118440     | NCT01635218              |
| Macias-Cortés | 2017             | Is metabolic dysregulation associated with antidepressant response in depressed women in climacteric treated with individualized homeopathic medicines or fluoxetine? The HOMDEP-MENOP Study                        | 10.1016/j.homp.2016.11.002       | NCT01635218              |
| Macias-Cortés | 2018             | Response to Individualized Homeopathic Treatment for Depression in Climacteric Women with History of Domestic Violence, Marital Dissatisfaction or Sexual Abuse: Results from the HOMDEP-MENOP Study                | 10.1055/s-0038-1654709           | NCT01635218              |
| Malapane      | 2014             | Efficacy of a homeopathic complex on acute viral tonsillitis                                                                                                                                                        | 10.1089/acm.2014.01              | No registration          |

| First author | Publication year | Title                                                                                                                                                                                                                                            | DOI                           | Registration             |
|--------------|------------------|--------------------------------------------------------------------------------------------------------------------------------------------------------------------------------------------------------------------------------------------------|-------------------------------|--------------------------|
|              |                  |                                                                                                                                                                                                                                                  | 89                            | detected                 |
| Manchanda    | 2016             | Homoeopathic treatment for lower urinary tract symptoms in men with benign prostatic hyperplasia: An open randomized multicentric placebo controlled clinical trial                                                                              | Not available                 | CTRI/2012/05/002649      |
| Mehra        | 2020             | Efficacy of homoeopathic treatment for diabetic distal symmetric polyneuropathy: A multicentric randomised double-blind placebo-controlled clinical trial                                                                                        | 10.1016/j.explore.2020.05.007 | CTRI/2013/07/003818      |
| Mehta        | 2013             | Comparative evaluation of a herbal mouthwash (Freshol) with chlorhexidine on plaque accumulation, gingival inflammation, and salivary Streptococcus mutans growth                                                                                | 10.4103/2231-0762.115717      | No registration detected |
| Meissner     | 2011             | Organ-specificity of placebo effects on blood pressure                                                                                                                                                                                           | 10.1016/j.autneu.2011.06.006  | NCT00937196*             |
| Michael      | 2019             | Efficacy of individualized homeopathic treatment of insomnia: Double-blind, randomized, placebo-controlled clinical trial                                                                                                                        | 10.1016/j.ctim.2019.01.007    | CTRI/2017/05/008450      |
| Michalsen    | 2017             | [Wirksamkeit und Verträglichkeit eines homöopathischen Komplexmittels (Sinusitis Hevert SL) bei akuter, unkomplizierter Rhinosinusitis: Eine multizentrische, randomisierte, doppelblinde, placebokontrollierte Studie an erwachsenen Patienten] | 10.1159/000471922             | NCT02296814              |
| Misra        | 2021             | Individualized Homeopathic Medicines in Chronic Rhinosinusitis: Randomized, Double-Blind, Placebo-Controlled Trial                                                                                                                               | 10.1055/s-0040-1715842        | CTRI/2018/03/012557      |
| Morris       | 2016             | Physiotherapy and a Homeopathic Complex for Chronic Low-back Pain Due to Osteoarthritis: A Randomized, Controlled Pilot Study                                                                                                                    | NCT02207998                   | NCT02207998              |
| Mourao       | 2013             | Additional benefits of homeopathy in the treatment of chronic periodontitis: A randomized clinical trial.                                                                                                                                        | 10.1016/j.ctcp.2013.05.002    | No registration detected |
| Mourao       | 2014             | Additional effects of homeopathy on chronic periodontitis: a 1-year followup randomized clinical trial                                                                                                                                           | 10.1016/j.ctcp.2014.03.003    | No registration detected |
| Mourao       | 2019             | Homeopathy and Periodontal Treatment in Type II Diabetic Patients: a 1-Year Randomized Clinical Trial                                                                                                                                            | 10.1590/0103-6440201902124    | No registration detected |
| Mousavi      | 2009             | Homeopathic treatment of minor aphthous ulcer: a randomized, placebo-controlled clinical trial                                                                                                                                                   | 10.1016/j.homp.2009.05.006    | No registration detected |
| Mousavi      | 2009             | Ignatia in the treatment of oral lichen planus.                                                                                                                                                                                                  | 10.1016/j.homp.2008.11.007    | No registration detected |
| Nahar        | 2019             | An open-label randomized pragmatic non-inferiority pilot trial to compare the effectiveness of Dysentery compound with individualized homeopathic medicines in irritable bowel syndrome                                                          | 10.1515/jcim-2018-0217        | CTRI/2017/05/008480      |
| Naidoo       | 2013             | A randomized placebo-controlled pilot study of Cat saliva 9cH and Histaminum 9cH in cat allergic adults                                                                                                                                          | 10.1016/j.homp.2013.02.007    | No registration detected |

| First author | Publication year | Title                                                                                                                                                                                | DOI                              | Registration             |
|--------------|------------------|--------------------------------------------------------------------------------------------------------------------------------------------------------------------------------------|----------------------------------|--------------------------|
| Nair         | 2014             | Homoeopathic genus epidemicus 'Bryonia alba' as a prophylactic during an outbreak of Chikungunya in India: A cluster-randomised, double-blind, placebo-controlled trial              | 10.4103/0974-7168.141739         | No registration detected |
| Naskar       | 2020             | Efficacy of Dioscorea villosa 6CH in treatment of dyslipidemia: A double-blind, randomized, placebo-controlled, clinical trial                                                       | 10.4103/jpnr.JPNR_13_19          | CTRI/2018/04/013511      |
| Naude        | 2010             | Chronic primary insomnia: efficacy of homeopathic simillimum.                                                                                                                        | 10.1016/j.homp.2009.11.001       | No registration detected |
| Oberai       | 2013             | Homoeopathic management of attention deficit hyperactivity disorder: A randomised placebo-controlled pilot trial.                                                                    | 10.4103/0974-7168.123389         | CTRI/2011/12/002305      |
| Oberai       | 2016             | A multicentric randomized clinical trial of homoeopathic medicines in fifty millesimal potencies vis a vis centesimal potencies on symptomatic uterine fibroids                      | Not available                    | CTRI/2011/12/002211      |
| Oberai       | 2018             | Effectiveness of Homeopathic Medicines as Add-on to Institutional Management Protocol for Acute Encephalitis Syndrome in Children: An Open-Label Randomized Placebo-Controlled Trial | 10.1055/s-0038-1656715           | CTRI/2017/01/007685      |
| Oberbaum     | 2005             | The effect of the homeopathic remedies Arnica and Bellis perennis on mild postpartum bleeding – a randomized, double-blind, placebo-controlled study – preliminary results.          | 10.1016/j.ctim.2005.03.006       | NCT01156194              |
| Pach         | 2011             | Efficacy of injections with Disci/Rhus toxicodendron compositum for chronic low back pain - A randomized placebo-controlled trial.                                                   | 10.1371/journal.pone.0026166     | NCT00567736              |
| Padilha      | 2011             | Homeopathic Plumbum metallicum for lead poisoning: a randomized clinical trial                                                                                                       | 10.1016/j.homp.2010.11.007       | NCT00931905              |
| Palm         | 2017             | Effectiveness of an add-on treatment with the homeopathic medication SilAtr-5-90 in recurrent tonsillitis: An international, pragmatic, randomized, controlled clinical trial        | 10.1016/j.ctcp.2017.05.005       | ISRCTN19016626           |
| Parewa       | 2021             | Individualized Homeopathic Medicines in the Treatment of Generalized Anxiety Disorder: A Double-Blind, Randomized, Placebo-Controlled, Pilot Trial                                   | 10.1159/000514524                | CTRI/2018/03/012685*     |
| Paris        | 2008             | Effect of homeopathy on analgesic intake following knee ligament reconstruction: a phase III monocentre randomized placebo controlled study                                          | 10.1111/j.1365-2125.2007.03008.x | NCT00222365              |
| Paris        | 2011             | Effect of Gelsemium 5CH and 15CH on anticipatory anxiety: A phase III, single-centre, randomized, placebo-controlled study.                                                          | 10.1111/j.1472-8206.2011.00993.x | NCT00914329              |
| Paterson     | 2003             | Treating dyspepsia with acupuncture and homeopathy: reflections on a pilot study by researchers, practitioners and participants                                                      | 10.1016/s0965-2299(03)00056-6    | No registration detected |
| Peckham      | 2014             | Interim results of a randomised controlled trial of homeopathic treatment for irritable bowel syndrom                                                                                | 10.1016/j.homp.2014.05.001       | ISRCTN90651143           |
| Pedrero-     | 2016             | Hospital clinical trial: Homeopathy (Agraphis nutans 5CH, Thuyaoccidentalis 5CH,                                                                                                     | 10.1016/j.ijporl.2016.           | 2011-006086-17           |

| First author | Publication year | Title                                                                                                                                                                                           | DOI                                                                                               | Registration                  |
|--------------|------------------|-------------------------------------------------------------------------------------------------------------------------------------------------------------------------------------------------|---------------------------------------------------------------------------------------------------|-------------------------------|
| Escalas      |                  | Kalium muriaticum 9CH and Arsenicum iodatum 9CH) as adjuvant, in children with otitis media with effusion.                                                                                      | 06.039                                                                                            |                               |
| Pellow       | 2013             | A randomised pilot study on the efficacy of milking cream and a homeopathic complex topical cream on diaper dermatitis                                                                          | <a href="https://dx.doi.org/10.4102/hsag.v18i1.680">https://dx.doi.org/10.4102/hsag.v18i1.680</a> | No registration detected      |
| Perol        | 2012             | Can treatment with Cocculine improve the control of chemotherapy-induced emesis in early breast cancer patients? A randomized, multi-centered, double-blind, placebo-controlled Phase III trial | 10.1186/1471-2407-12-603                                                                          | NCT00409071                   |
| Plezbert     | 2005             | Effects of the homeopathic remedy Arnica on attenuating symptoms of exercise-induced muscle soreness                                                                                            | 10.1016/S0899-3467(07)60124-4                                                                     | No registration detected      |
| Pommier      | 2004             | Phase III randomized trial of Calendula officinalis compared with trolamine for the prevention of acute dermatitis during irradiation for breast cancer.                                        | 10.1200/JCO.2004.07.063                                                                           | No registration detected      |
| Pramanick    | 2018             | An open-label randomized clinical trial to study the comparative effectiveness of individualized homeopathic medicine with Curare 30CH in cases of post cerebrovascular accident hemiparesis    | Not available                                                                                     | CTRI/2017/05/008532           |
| Pramanick    | 2020             | An open-label randomized pragmatic non-inferiority pilot trial comparing the effectiveness of Curare 30CH against individualized homeopathic medicines in post-stroke hemiparesis               | 10.1016/j.aimed.2019.06.002                                                                       | CTRI/2017/05/008480           |
| Qutubuddin   | 2019             | Efficacy of individualized homeopathy in bronchial asthma in adults: Double-blind, randomized, placebo-controlled, clinical trial in the context of usual care                                  | 10.1016/j.aimed.2018.08.005                                                                       | CTRI/2017/08/009192           |
| Raak         | 2019             | Effectiveness of a homeopathic complex medicine in infantile colic: A randomized multicenter study                                                                                              | 10.1016/j.ctim.2019.05.026                                                                        | Roszdraznador: study no 34-34 |
| Rajpal       | 2019             | Asclepias curassavica - A Multicentric, Randomised, Double-Blind Homeopathic Pathogenetic Trial                                                                                                 | 10.1055/s-0039-3400248                                                                            | No registration detected      |
| Ramesh       | 2020             | Evaluation of dentifrices of complementary and alternative medicinal systems on plaque formation and gingivitis: A randomized controlled clinical trial                                         | 10.4317/jced.56333                                                                                | CTRI/2018/04/013103           |
| Razlog       | 2012             | A pilot study on the efficacy of Valeriana officinalis mother tincture and Valeriana officinalis 3x in the treatment of attention deficit hyperactivity disorder.                               | 10.4102/hsag.v17i1.603                                                                            | No registration detected      |
| Relton       | 2009             | Healthcare provided by a homeopath as an adjunct to usual care for fibromyalgia (FMS): results of a pilot randomised controlled trial                                                           | 10.1016/j.homp.2008.12.004                                                                        | 2005-004511-29                |
| Relton       | 2012             | A pilot 'cohort multiple randomised controlled trial' of treatment by a homeopath for women with menopausal hot flushes                                                                         | 10.1016/j.cct.2012.04.003                                                                         | No registration detected      |
| Robertson    | 2007             | Homeopathic Arnica montana for post-tonsillectomy analgesia: a randomised placebo control trial.                                                                                                | 10.1016/j.homp.2006.10.005                                                                        | No registration detected      |
| Sadhukhan    | 2021             | Individualized Homeopathic Medicines in Stage I Essential Hypertension: A Double-Blind, Randomized, Placebo-Controlled Pilot Trial                                                              | 10.1089/acm.2020.0222                                                                             | CTRI/2018/03/012671*          |
| Saha         | 2013             | Individualized homeopathy versus placebo in essential hypertension: A double-blind randomized controlled trial                                                                                  | Not available                                                                                     | CTRI/2012/02/002464           |



| First author | Publication year | Title                                                                                                                                                                                                                                                                  | DOI                         | Registration             |
|--------------|------------------|------------------------------------------------------------------------------------------------------------------------------------------------------------------------------------------------------------------------------------------------------------------------|-----------------------------|--------------------------|
| Sajedi       | 2008             | The effect of adding homeopathic treatment to rehabilitation on muscle tone of children with spastic cerebral palsy                                                                                                                                                    | 10.1016/j.ctcp.2007.11.001  | No registration detected |
| Schmidt      | 2002             | Does a homeopathic ultramolecular dilution of Thyroidinum 30cH affect the rate of body weight reduction in fasting patients? A randomized placebo-controlled double-blind clinical trial.                                                                              | 10.1054/homp.2002.0049      | No registration detected |
| Seeley       | 2006             | Effect of homeopathic Arnica montana on bruising in face-lifts: results of a randomized, double-blind, placebo-controlled clinical trial                                                                                                                               | 10.1001/archfaci.8.1.54     | No registration detected |
| Selkova      | 2005             | Use of the medicine Oscillocochinum® for the prevention and treatment of influenza and acute respiratory viral infection.                                                                                                                                              | Not available               | No registration detected |
| Sencer       | 2012             | Traumeel S in preventing and treating mucositis in young patients undergoing SCT: a report of the Children's Oncology Group.                                                                                                                                           | 10.1038/bmt.2012.30         | NCT00080873              |
| Shamsheva    | 2014             | Prophylaxis of influenza and acute respiratory viral infection in frequently ill children by combined administration of a vaccine and the homeopathic remedy influcid                                                                                                  | Not available               | No registration detected |
| Shukla       | 2020             | Effects of pre-defined Homeopathic medicines to mitigate adverse dermatological effects of radiotherapy and vomiting of chemotherapy in breast carcinoma: A randomised, double-blind, placebo-controlled, pilot trial in the context of usual care                     | 10.4103/ijrh.ijrh_8_19      | No registration detected |
| Siebenwirth  | 2009             | Wirksamkeit einer klassisch-homöopathischen Therapie bei atopischem Ekzem. Eine randomisierte, placebokontrollierte Doppelblindstudie [Effectiveness of classical homeopathic treatment in atopic eczema. A randomised placebo-controlled double-blind clinical trial] | 10.1159/000242434           | No registration detected |
| Singer       | 2010             | Traumeel S for pain relief following hallux valgus surgery: a randomized controlled trial                                                                                                                                                                              | 10.1186/1472-6904-10-9      | NCT00279513              |
| Sinha        | 2012             | Randomized controlled pilot study to compare homeopathy and conventional therapy in acute otitis media                                                                                                                                                                 | 10.1016/j.homp.2011.08.003  | No registration detected |
| Siqueira     | 2016             | Homeopathic medicines for prevention of influenza and acute respiratory tract infections in children: blind, randomized, placebo-controlled clinical trial.                                                                                                            | 10.1016/j.homp.2015.02.006  | No registration detected |
| Smith        | 2002             | Effective treatment of seborrhoeic dermatitis using a low dose, oral homeopathic medication consisting of potassium bromide, sodium bromide, nickel sulfate, and sodium chloride in a double-blind, placebo-controlled study.                                          | Not available               | No registration detected |
| Sorrentino   | 2017             | Is there a role for homeopathy in breast cancer surgery? A first randomized clinical trial on treatment with Arnica montana to reduce post-operative seroma and bleeding in patients undergoing total mastectomy                                                       | 10.5455/jice.20161229055245 | No registration detected |
| Souza        | 2021             | Comparative Effectiveness of the Homeopathic Preparation Traumeel S in Third Molar Extraction Surgery: A Preliminary Triple-Blind Clinical Trial                                                                                                                       | 10.1055/s-0041-1725038      | NCT03567369              |
| Steinsbekk   | 2005             | Homeopathic care for the prevention of upper respiratory tract infections in children: a pragmatic, randomized, controlled trial comparing randomized                                                                                                                  | 10.1016/j.ctim.2005.06.007  | No registration detected |

| First author      | Publication year | Title                                                                                                                                                                                                                      | DOI                              | Registration             |
|-------------------|------------------|----------------------------------------------------------------------------------------------------------------------------------------------------------------------------------------------------------------------------|----------------------------------|--------------------------|
|                   |                  | homeopathic care and waiting-list controls                                                                                                                                                                                 |                                  |                          |
| Steinsbekk        | 2005             | Self treatment with one of three self selected, ultramolecular homeopathic medicines for the prevention of upper respiratory tract infections in children. A double-blind randomized placebo controlled trial.             | 10.1111/j.1365-2125.2005.02336.x | No registration detected |
| Stepanova         | 2017             | The combined treatment of dysphonia in the subjects engaged in the voice and speech professions                                                                                                                            | 10.17116/otorino201782348-53     | No registration detected |
| Stevinson         | 2003             | Homeopathic arnica for prevention of pain and bruising: randomized placebo-controlled trial in hand surgery.                                                                                                               | 10.1258/jrsm.96.2.60             | No registration detected |
| Stoffel           | 2007             | Euphrasia-Augentropfen bei Neugeborenen: Ein Pilotprojekt. [Euphrasia eye drops in neonates: a pilot project.]                                                                                                             | 10.1159/000283798                | NCT04122300              |
| Tavares-Silva     | 2019             | Homeopathic medicine of <i>Melissa officinalis</i> combined or not with <i>Phytolacca decandra</i> in the treatment of possible sleep bruxism in children: A crossover randomized triple-blinded controlled clinical trial | 10.1016/j.phymed.2019.152869     | NCT02870543              |
| Taylor            | 2011             | Homeopathic ear drops as an adjunct to standard therapy in children with acute otitis media                                                                                                                                | 10.1016/j.homp.2011.03.002       | NCT00622518              |
| Taylor            | 2014             | Homeopathic Ear Drops as an Adjunct in Reducing Antibiotic Usage in Children With Acute Otitis Media                                                                                                                       | 10.1177/2333794x14559395         | NCT01003210              |
| Teixeira          | 2017             | Potentized estrogen in homeopathic treatment of endometriosis-associated pelvic pain: A 24-week, randomized, double-blind, placebo-controlled study                                                                        | 10.1016/j.ejogrb.2017.01.052     | NCT02427386              |
| Teut              | 2013             | Effects and feasibility of an Integrative Medicine program for geriatric patients – a cluster-randomized pilot study.                                                                                                      | 10.2147/CIA.S45242               | NCT00974506*             |
| Teut              | 2013             | Homeopathic drug proving of <i>Okoubaka aubrevillei</i> : a randomised placebo-controlled trial                                                                                                                            | 10.1186/1745-6215-14-96          | NCT01061229              |
| Thinesse-Mallwitz | 2015             | A homeopathic combination preparation in the treatment of feverish upper respiratory tract infections: an international randomized controlled trial                                                                        | 10.1159/000430762                | ISRCTN60440500           |
| Thompson          | 2005             | A pilot, randomized, double-blinded, placebo-controlled trial of individualized homeopathy for symptoms of estrogen withdrawal in breast-cancer survivors                                                                  | 10.1089/acm.2005.11.13           | No registration detected |
| Thompson          | 2011             | The feasibility of a pragmatic randomised controlled trial to compare usual care with usual care plus individualised homeopathy, in children requiring secondary care for asthma.                                          | 10.1016/j.homp.2011.05.001       | No registration detected |
| Topcu             | 2020             | Evaluating the effect on asthma quality of life of added reflexology or homeopathy to conventional asthma management - an investigator-blinded, randomised, controlled parallel group study                                | 10.1080/20018525.2020.1793526    | NCT01426061              |
| Topcu             | 2020             | The impact of reflexology and homeopathy added to conventional asthma treatment on markers of airway inflammation – a randomised study                                                                                     | 10.1080/20018525.2020.1726153    | NCT01426061              |
| Totonchi          | 2007             | A randomized, controlled comparison between arnica and steroids in the                                                                                                                                                     | 10.1097/01.prs.00002             | No registration          |

| First author     | Publication year | Title                                                                                                                                                                                                                                                 | DOI                              | Registration             |
|------------------|------------------|-------------------------------------------------------------------------------------------------------------------------------------------------------------------------------------------------------------------------------------------------------|----------------------------------|--------------------------|
|                  |                  | management of postrhinoplasty ecchymosis and edema.                                                                                                                                                                                                   | 64397.80585.bd                   | detected                 |
| van Haselen      | 2016             | The effectiveness and safety of a homeopathic medicinal product in pediatric upper respiratory tract infections with fever: a randomized controlled trial.                                                                                            | 10.1177/2333794X16654851         | ISRCTN60440500           |
| Varanasi         | 2020             | Effects of individualised homeopathic intervention in Stage I essential hypertension: A single-blind, randomised, placebo-controlled trial                                                                                                            | 10.4103/ijrh.ijrh_93_19          | CTRI/2018/08/015228      |
| Viksveen         | 2017             | Depressed patients treated by homeopaths: a randomised controlled trial using the "cohort multiple randomised controlled trial" (cmRCT) design                                                                                                        | 10.1186/s13063-017-2040-2        | ISRCTN0248459            |
| Vilhena          | 2016             | Homeopathic Treatment of Overweight and Obesity in Pregnant Women With Mental Disorders: A Double-blind, Controlled Clinical Trial                                                                                                                    | Not available                    | NCT00942097              |
| Villanueva       | 2012             | Use of homeopathic formula in malnourished children.                                                                                                                                                                                                  | Not available                    | No registration detected |
| von Hagens       | 2011             | Treating menopausal symptoms with a complex remedy or placebo: a randomized controlled trial.                                                                                                                                                         | 10.3109/13697137.2011.597895     | NCT00152776              |
| Voß              | 2018             | Efficacy and tolerability of a complex homeopathic drug in children suffering from dry cough-A double-blind, placebo-controlled, clinical trial                                                                                                       | 10.1055/s-0043-124179            | CAS07001*                |
| Weatherley-Jones | 2004             | A randomized, controlled, triple-blind trial of the efficacy of homeopathic treatment for chronic fatigue syndrome                                                                                                                                    | 10.1016/S0022-3999(03)00377-5    | No registration detected |
| White            | 2003             | Individualised homeopathy as an adjunct in the treatment of childhood asthma: a randomised placebo controlled trial                                                                                                                                   | 10.1136/thorax.58.4.317          | No registration detected |
| Witt             | 2009             | Monthly itraconazole versus classic homeopathy for the treatment of recurrent vulvovaginal candidiasis: a randomised trial                                                                                                                            | 10.1111/j.1471-0528.2009.02262.x | NCT00895453              |
| Wolf             | 2003             | Wirksamkeit von Arnica bei Varizenoperation: Ergebnisse einer randomisierten, doppelblinden, Placebo-kontrollierten Pilot-Studie [Efficacy of Arnica in varicose vein surgery: results of a randomized, double-blind, placebo-controlled pilot study] | 10.1159/000074778                | No registration detected |
| Yakir            | 2019             | A Placebo-Controlled Double-Blind Randomized Trial with Individualized Homeopathic Treatment Using a Symptom Cluster Approach in Women with Premenstrual Syndrome                                                                                     | 10.1055/s-0039-1691834           | NCT02402049              |
| Zabolotnyi       | 2007             | Efficacy of a complex homeopathic medication (Sinfrontal) in patients with acute maxillary sinusitis: a prospective, randomized, double-blind, placebo-controlled, multicenter clinical trial.                                                        | 10.1016/j.explore.2006.12.007    | No registration detected |
| Zafar            | 2016             | A randomized controlled trial comparing Pentazocine and Chamomilla recutita for labor pain relief                                                                                                                                                     | 10.1016/j.homp.2015.09.003       | No registration detected |
| Zanasi           | 2014             | Homeopathic medicine for acute cough in upper respiratory tract infections and acute bronchitis: A randomized, double-blind, placebo-controlled trial                                                                                                 | 10.1016/j.pupt.2013.05.007       | No registration detected |
| Zavadenko        | 2015             | Current possibilities in pharmacotherapy of anxiety disorders in children and adolescents                                                                                                                                                             | 10.17116/jnevro201511511133-39   | No registration detected |

\*The registration of this study was initially missed and added later to this table
